# Supplementary material for: Photoactive centers responsible for visible-light photoactivity of N-doped TiO2
Source: Royal Society of Chemistry journal article supplement (doi:10.1039/b719498f), 2008-01-01
Supplement: b719498f.pdf [file b719498f.pdf]

## Supplementary material

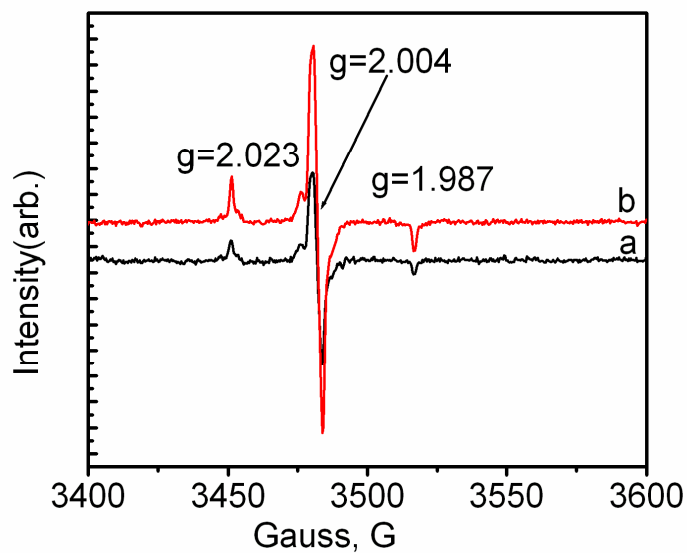

Fig.1 ESR spectra of N-P25(600) and N-P25(700) prepared by treating P25-TiO<sub>2</sub> in an NH<sub>3</sub> flow for 4h at 600°C and 700 °C, respectively.(a: N-P25(600); b: N-P25(700))

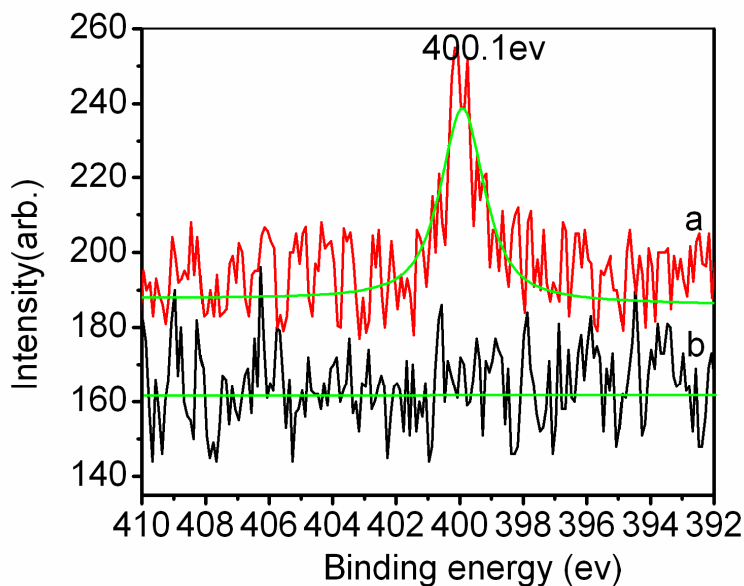

Fig.2 XPS spectra of N-P25(600) and N-P25(700) prepared by treating P25-TiO<sub>2</sub> in an NH<sub>3</sub> flow for 4h at 600 °C and 700 °C, respectively.(a: N-P25(600); b: N-P25(700))

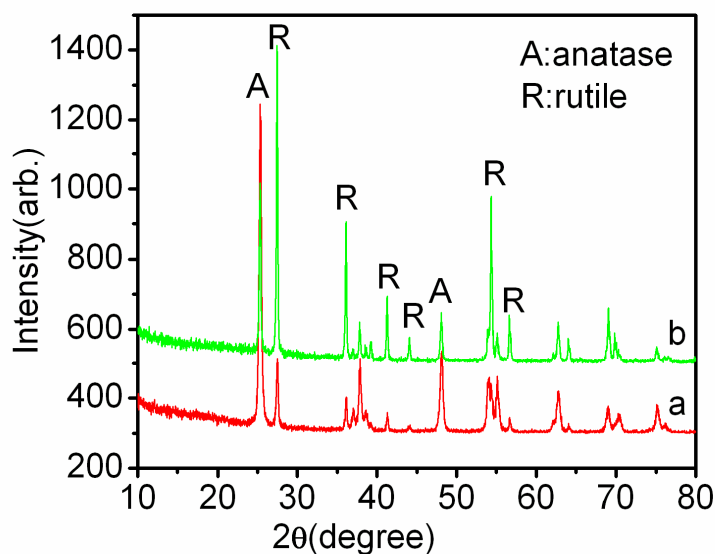

Fig.3 XRD spectra of N-P25(600) and N-P25(700) prepared by treating P25-TiO<sub>2</sub> in an NH<sub>3</sub> flow for 4h at 600 °C and 700 °C, respectively.(a: N-P25(600); b: N-P25(700))

Fig.1a, b show the triplet ESR spectra of N-P25(600) and N-P25(700), both samples were prepared by treating P25-TiO<sub>2</sub> in an NH<sub>3</sub> flow for 4h at 600 °C and 700 °C, respectively. It can be seen that the peak intensity of the latter is even higher than that of the former, however, the N1s spectrum of N-P25(700) shows the absence of surface nitrogen(see Fig.2b). Why does N-P25(700) without doped nitrogen also show a triplet ESR signal? The crystalline form of N-P25(700) mainly belongs to rutile system(see Fig.3b). It is suggested that in the weak reducing NH<sub>3</sub> atmosphere, rutile TiO<sub>2</sub> cannot be doped by nitrogen, but can be reduced to form single-electron-trapped vacancies(V<sub>o</sub><sup>•</sup>) peak with  $g=2.004$  at  $T=700^{\circ}\text{C}$ . What the polar molecules adsorbed on N-P25(700) play the role in inducing two weak ESR signal with  $g=2.023, 1.987$ ? This issue is under investigating in our lab. Additionally, N-P25(700) does not show visible light photoactivity(see text), which may be resulted from the change of crystalline form of

Supplementary Material (ESI) for New Journal of Chemistry  
This journal is (c) The Royal Society of Chemistry and  
The Centre National de la Recherche Scientifique, 2008

TiO<sub>2</sub> (i.e. anatase as the major phase for N-P25(600) in Fig. 3a; rutile as the major phase  
for N-P25(700) in Fig. 3b).
